# Supplementary material for: Microbial diversity within the digestive tract contents of Dezhou donkeys
Source: PLOS journal article supplement (doi:10.1371/journal.pone.0226186), 2019-12-13
Supplement: S1 (10.1371/journal.pone.0226186.s001) [file journal.pone.0226186.s001]

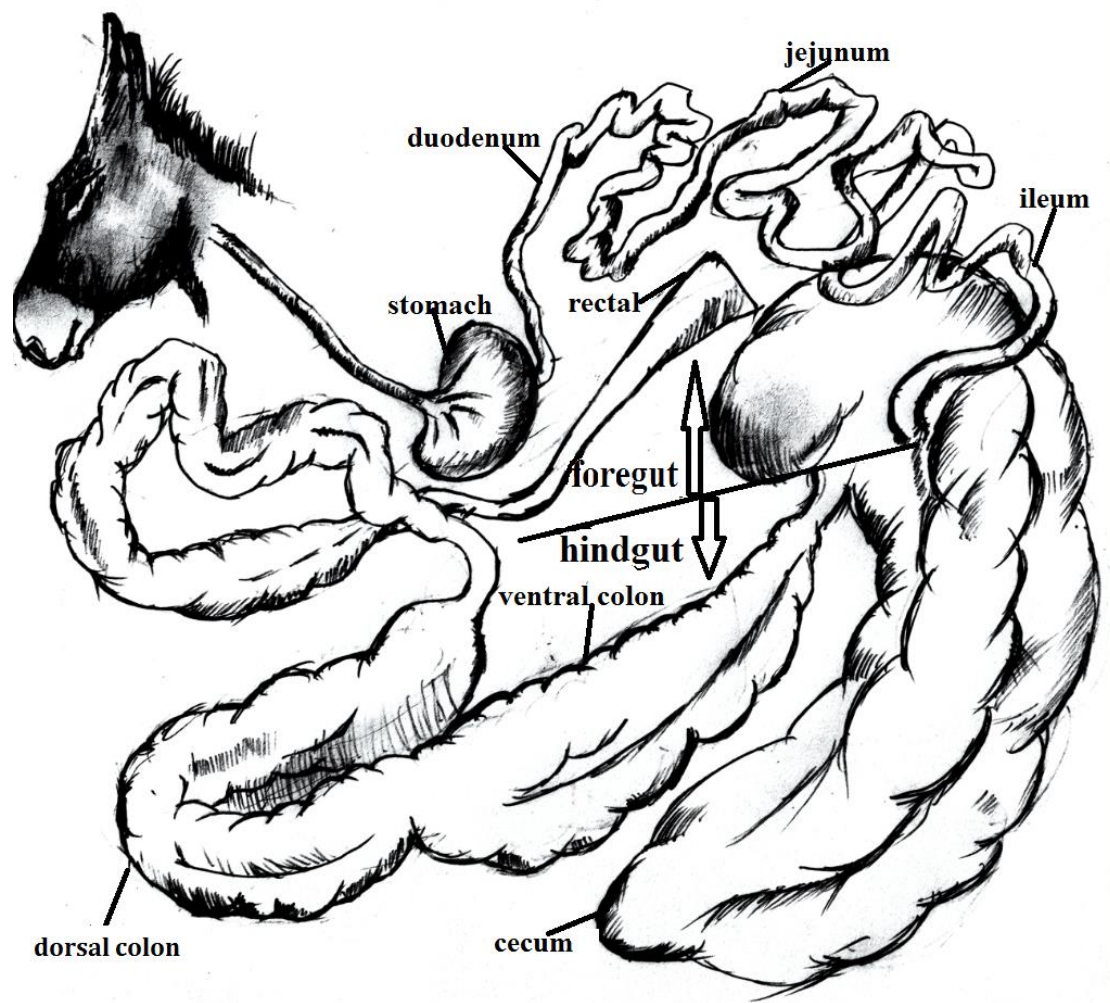

S1 Figure. Sampling of the GIT of Dezhou donkeys. Foregut and hindgut was divided by the ileocecal valves.
